# Supplementary material
Source: publisher site journal article supplement (https://www.degruyterbrill.com/publication/dbid/saeo/downloadAsset/SAEO_SAEO%20Fahlbusch%20-%20SS-Ahnenerbe.pdf)
Supplement: Supplementary file 1 [file SAEO_SAEO%20Fahlbusch%20-%20SS-Ahnenerbe.pdf]

# SS-Ahnenerbe

Das „Ahnenerbe“ war eine Forschungsorganisation der SS. Die Entwicklung verlief von Auftragsforschung zu völkischen und teilweise auch esoterischen Fragen über naturwissenschaftliche Forschungen bis hin zu verbrecherischen Menschenversuchen in wehrmedizinischen Bereichen.

In der Literatur werden unter dem Begriff „Ahnenerbe“ verschiedene Institutionen genannt und oft auch synonym verwendet. Der Verein Ahnenerbe firmierte unter „Deutsches Ahnenerbe‘ Studiengesellschaft für Geistesurgeschichte e. V.“, später unter „Das Ahnenerbe e. V.“ Dieser Verein existierte vom 1. Juli 1935 bis zum 24. November 1955.<sup>1</sup> Am 17. März 1942 wurde das Ahnenerbe parallel zum Verein nach vorheriger formloser Eingliederung formal als Amt A in das Hauptamt Persönlicher Stab Reichsführer SS integriert.<sup>2</sup> Diese Einrichtung erlosch spätestens mit dem Kontrollratsgesetz Nr. 2 am 10. Oktober 1945. Sporadisch wurde auch die Bezeichnung „Amt für kulturelle und wissenschaftliche Aufgaben des RF-SS“ verwendet.<sup>3</sup> Die am Ende dieses Beitrags erläuterte Ahnenerbe-Stiftung wurde am 15. August 1937 gegründet und bestand bis zum 2. September 1948. Die Auflösung erfolgte nicht, weil es sich um eine NS-Organisation handelte, sondern wegen Vermögenslosigkeit.<sup>4</sup>

Am 1. Juli 1935 gründeten Heinrich Himmler, der deutsch-niederländische Privatgelehrte →Herman Wirth sowie fünf weitere Mitglieder den Verein „Deutsches Ahnenerbe‘ Studiengesellschaft für Geistesurgeschichte e. V.“, wählten Wirth zum Präsidenten und Himmler zum Kuratoriumsvorsitzenden. Himmler gründete die Forschungseinrichtung zunächst nicht zum Zweck wissenschaftlich orientierter und ergebnisoffener Erkenntnissuche, sondern zur Bestätigung seiner manchmal kruden Theorien.<sup>5</sup> Wenn die Forschungsergebnisse „mit den Ansichten des Reichsführers nicht übereinstimmten“, wurden sie auch nicht publiziert.<sup>6</sup>

Neben Himmler und Wirth war →Wolfram Sievers die prägende Figur des Ahnenerbe. Der gelernte Verlagskaufmann sollte zunächst als kaufmännischer Leiter mit dem Titel „Generalsekretär“ die Büroarbeit des Vereins organisieren. Zugleich war Sievers von der Gründung bis zum 1. Januar 1939 rechtlich alleiniger Vertreter des Vereins, ab diesem Datum wurde Himmler als alleiniger Vorstand und damit Nachfolger von Sievers im Vereinsregister eingetragen.<sup>7</sup> Rasch dominierte Sievers – zunächst stark in den von Himmler akzeptierten Bahnen – das Ahnenerbe durch sein Organisationstalent. Nachdem mit dem Münchner Indogermanisten →Walther Wüst ein renommierter Wissenschaftler zum Ahnenerbe gestoßen war, nutzte Sievers dessen Erfahrung in der Forschungsförderung, um fortan bei der DFG den in der Gesamtbetrachtung

---

1 Amtsgericht Charlottenburg von Berlin, Vereinsregister, Registerblatt.

2 NARA, T-580 Roll 462/463, Diensttagebuch Sievers vom 2.4.1942. Während die Abkürzung für Reichsführer-SS in der Regel RFSS lautete, wurde in den gegenständlichen Dokumenten RF-SS als Abkürzung verwendet.

3 BArch, NS 21/53, Diensttagebuch Sievers vom 26.7.1943.

4 Landesarchiv Berlin (LAB), C Rep 105 Nr. 4369.

5 BArch, NS 21/567, Bericht des Wirtschaftsprüfers Georg Niethammer vom 31.3.1937: Als Gründungsmitglieder werden genannt: Dr. Hermann Reischle, Dr. Adolf Babel, Erwin Metzner, George Ebrecht, Richard Hintmann.

6 Michael H.Kater, Das „Ahnenerbe“ der SS 1935–1945, München 2005, S. 72.

7 Amtsgericht Charlottenburg von Berlin, Vereinsregister, 95 VR 7996, S. 2.

prozentual größten Mittelzufluss für das Ahnenerbe einzuwerben. In absoluten Zahlen lag dieser beispielsweise im Rechnungsjahr 1938/39 bei RM 170.000, im Rechnungsjahr 1939/40 bei RM 250.000 und im Rechnungsjahr 1942/43 bei RM 300.000.<sup>8</sup> Himmler und Sievers ergriffen ab 1937 die Gelegenheit, den Einfluss von Wirth und den Vertrauten des Reichsbauernführers Richard Walther Darré – dessen Reichsnährstand der bisherige Hauptfinanzier war – erheblich zu beschneiden.<sup>9</sup> Mit der Satzungsänderung vom 30. März 1937 firmierten Himmler als Kurator, Wüst als Präsident und Sievers als Reichsgeschäftsführer. Mit der Satzungsänderung vom 1. Januar 1939 wurde Himmler Präsident, Wüst – bei unveränderter Aufgabenstellung als wissenschaftlicher Leiter – Kurator, und Sievers blieb Reichsgeschäftsführer. Jedoch wurde er de jure als einziger rechtlicher Vertreter des Vereins von Himmler abgelöst.<sup>10</sup> Dies bedeutete aber keineswegs eine Reduzierung der machtvollen Stellung Sievers', dessen Kompetenzen de facto nicht beschnitten wurden. Er hatte in wenigen Jahren bis zum Kriegsbeginn mehrere Dutzend Forschungsstätten im Ahnenerbe aufgebaut oder sie als bestehende Einrichtungen in den Verein inkorporiert. Davon waren einige sehr umfangreich, wie die Forschungsstätte für Botanik unter Philipp Freiherr von Luetzelburg; andere waren erst in Vorbereitung, wie die Forschungsstätte Innerasien und Expeditionen, die unter anderem die Tibet-Expedition unter Ernst Schäfer auswerten sollte; wieder andere bestanden noch bei Kriegsausbruch mehr oder weniger nur auf dem Papier. Zu den inkorporierten Forschungsstätten gehörte das Salzburger Haus der Natur, gegründet 1924 und bis heute von Weltrang. Hierin ist ein Beispiel für Sievers' Vorgehensweise zu sehen, bevorzugt bestehende Einrichtungen in das Ahnenerbe zu inkorporieren, anstatt neue Einrichtungen aufzubauen.

Sievers rief auch gemeinsame Projekte mit anderen Institutionen ins Leben. Das Projekt „→Wald und Baum in der arisch-germanischen Geistes- und Kulturgeschichte“ war, bezogen auf das Budget und die Anzahl der beteiligten Forscher, eines der größten des Ahnenerbe. Vornehmlich waren Geisteswissenschaftler beteiligt, aber es kamen auch Kompetenzen aus anderen wissenschaftlichen Disziplinen hinzu, beispielsweise von Seiten des Reichsforstamtes und des Reichslandwirtschaftsministeriums.

Sievers gelang es im Zuge der Ahnenerbe-Expansion, Anteil und Einfluss jener Forscher zu reduzieren, deren Projekte aus heutiger Sicht als fragwürdig zu bezeichnen sind, beispielsweise die Wünschelruten-, Welteis- und Hexenforschung. Zugleich wuchs der Anteil jener Wissenschaftler, die nach allgemein anerkannten wissenschaftlichen Standards arbeiteten. Hierzu zählte etwa der Prähistoriker Herbert Jankuhn mit seinen Grabungen in Haindorf bei Schleswig, ferner der Volksmusikforscher Alfred Quellmalz, sowie der Höhlenforscher Hans Brand. Über dessen Forschungsstätte für Karst- und Höhlenkunde gelang es Sievers, beinahe diese gesamte Forschungsrichtung im deutschen Einflussgebiet zu dominieren. Nach Kriegsbeginn bildete sich innerhalb der wissenschaftlichen Leitung des Ahnenerbe eine Arbeitsteilung heraus: Wüst

<sup>8</sup> BArch, NS 21/28, Bewilligungsschreiben der DFG aus verschiedenen Jahren.

<sup>9</sup> Kater, Ahnenerbe, S. 64.

<sup>10</sup> Amtsgericht Charlottenburg von Berlin, Vereinsregister, 95 VR 7996, S. 33ff.

betreute die geisteswissenschaftlichen Bereiche, der Ornithologe und Tibet-Forscher Ernst Schäfer die naturwissenschaftlichen.<sup>11</sup>

Das Ahnenerbe hatte bis Kriegsende rund fünfzig Forschungsstätten. Einige existierten nur auf dem Papier, andere wurden kriegsbedingt stillgelegt, aber zahlreiche dieser Forschungsstätten arbeiteten bis kurz vor Kriegsende. Zu einigen dieser Einrichtungen gibt es bereits Literatur, andere sind noch nie wissenschaftlich untersucht worden. Zu zwei Einrichtungen hat es in der jüngeren Vergangenheit neue Forschungsergebnisse gegeben, die nicht nur die Arbeitsweise Sievers' deutlicher machen, sondern aufgrund wissenschaftlich-quellenorientierter Analyse mit zahlreichen Mythen über das Ahnenerbe aufräumen. Dies betrifft einerseits die „Straßburger Schädelammlung“ von Bruno Beger von der Forschungsstätte Innerasien und Expeditionen.<sup>12</sup> Andererseits betrifft dies das im Folgenden vorzustellende Institut für Wehrwissenschaftliche Zweckforschung (IWZ). An diesen Beispielen kann das Projektmanagement Sievers' exemplarisch charakterisiert werden.<sup>13</sup>

Sievers konnte sich ausrechnen, dass die zunehmende Rekrutierung von Ahnenerbe-Forschern zum Wehrdienst seine Einrichtung bedrohte und damit auch seine eigene Position, wenn auch die Zuwendungen der DFG laufend stiegen und Sievers stets auf großzügiges Entgegenkommen von DFG-Chef Rudolf Mentzel rechnen konnte.<sup>14</sup> Deshalb etablierte er ab 1941 neben den Geistes- und Naturwissenschaften im Ahnenerbe mit den Wehrwissenschaften ein weiteres Forschungsfeld im unter seiner Leitung. Der Begriff legt nahe, wie umfassend Sievers das neue Feld entwickeln wollte. Faktisch wurden von jenem, alle Gebiete der Militärwissenschaften – von Militärgeschichte über Festungsbau bis Wehrtechnik – umfassenden Begriff „Wehrwissenschaften“ nur die Gebiete Wehrmedizin und teilweise auch Unterstützungsleistungen für die Rüstungsforschung durch Auftragsrechenleistungen mit Leben gefüllt. Auf dem neuen Gebiet übernahm Sievers nicht allein die kaufmännische, sondern auch die wissenschaftliche Leitung und agierte weitgehend unabhängig von Wüst und dem restlichen Ahnenerbe.<sup>15</sup> Zwar gab es Überschneidungen bei einigen Mitarbeitern und Büroinfrastruktur, jedoch kann das IWZ – trotz dynamischer Entwicklung zwischen Juli 1942 und März 1945 – als Einrichtung gelten, die zwar aus dem Ahnenerbe heraus gegründet wurde, jedoch wirtschaftlich und programmatisch unabhängig von diesem agieren konnte.

Ein Anstoß für die wehrwissenschaftliche Zweckforschung, wie sie ab 1942 bezeichnet wurde, ging möglicherweise schon früh von Himmler aus: Kurz vor Kriegsausbruch hatte er Sievers angewiesen, dem Münchner Mediziner Sigmund Rascher über das Ahnenerbe eine Forschungsbeihilfe zukommen zu lassen. Rascher war bis dahin als unbezahlter Assistenzarzt an einer Klinik tätig gewesen. Als Gegenleistung sollte er beispielsweise herausoperierte

<sup>11</sup> Kater, Ahnenerbe, S. 215.

<sup>12</sup> Zur Straßburger Schädelammlung siehe Artikel „Straßburger Schädelammlung“. Eine Monographie zu dem Thema vom selben Verfasser erscheint in Bälde.

<sup>13</sup> Julien Reitzenstein, Himmlers Forscher, Paderborn 2014.

<sup>14</sup> BAArch, NS 21/256, Vermerk von Komanns und Eben vom 29.5.1941.

<sup>15</sup> Reitzenstein, Forscher, S. 46ff.

Geschwulste von Krebspatienten daraufhin untersuchen, ob in der Landwirtschaft eingesetzter Kunstdünger zu Krebs führen könne.<sup>16</sup>

Nach Kriegsausbruch wurde Rascher zur Luftwaffe eingezogen und regte dort aufgrund des privaten Zuganges seiner Frau zu Himmler an, bei diesem für Unterdruck- und Kälteversuche unter Realbedingungen an Konzentrationslager-Häftlingen im KZ Dachau zu werben. Mit der Entwicklung von neuen Flugzeugen, die in immer größere Höhen aufsteigen konnten, kam es zu neuen medizinischen Fragestellungen. Wenn auch Piloten durch mitgeführten Sauerstoff versorgt werden konnten, gab es Risiken, sobald ein Pilot eine beschädigte Maschine verlassen musste. Durch den Unterdruck und den Sauerstoffmangel in großen Höhen wurden die Piloten nach dem Aussteigen zumeist bewusstlos. Da sie den Fallschirm nicht mehr zu öffnen vermochten, drohten tödliche Verletzungen. Das Phänomen des plötzlichen Bewusstseinsverlustes sollte medizinisch untersucht werden. Die andere Fragestellung betraf Schädigungen durch Unterkühlung. Über Gewässern abgeschossene und unverletzt gelandete Flugzeugbesatzungen schwammen mit Schwimmwesten und anderen Hilfsmitteln sehr lange an der Wasseroberfläche. Aber oft konnten sie von den Rettungsmannschaften nur noch tot geborgen werden, da sie inzwischen an Unterkühlung verstorben waren oder kurz nach ihrer Rettung verstarben. Die Luftwaffe hatte Interesse herauszufinden, wie Verletzungen durch Unterkühlung hinausgezögert und wie Wiederaufwärmungen medizinisch am sinnvollsten durchgeführt werden konnten.

Die Rascher von Himmler gewährte Forschungsbeihilfe des Ahnenerbe wurde bei Kriegsbeginn gekürzt, da Rascher nun Wehrdienst leisten musste. Die genannten Unterdruck- und Unterkühlungsversuche führte Rascher als Luftwaffenarzt im Auftrage der Luftwaffe durch und nutzte dazu auch eine von der Luftwaffe bereitgestellte Unterdruckkammer. Himmler wies die für die Konzentrationslager zuständigen Stellen an, eine Versuchsstation sowie Häftlinge im KZ Dachau zur Verfügung zu stellen. Schnittstelle zwischen Himmler und Luftwaffe war Rascher als SS-Mitglied und Luftwaffenarzt. Himmler erhoffte sich durch diese Kooperation politisches Kapital, aber auch eine Wahrnehmung der SS durch die Wissenschaft. Ein Beispiel für dieses Anliegen ist die erste Fußnote einer Publikation des unten erwähnten Bakteriologen Eugen Haagen, der seinen Wehrdienst bei der Luftwaffe leistete. In dieser heißt es: „Die Untersuchungen wurden [...] durch den Reichsführer SS persönlich sowohl durch das SS-Wirtschaftsverwaltungshauptamt als auch durch das Institut für wehrwissenschaftliche Zweckforschung der Waffen-SS gefördert.“<sup>17</sup>

Rascher berichtete an seine Vorgesetzten bei der Luftwaffe und an Himmler, Sievers informierte er – in diesen und anderen Fällen – allenfalls sporadisch. Die Quellen zeigen zahlreiche Beispiele dafür, dass sich Rascher einerseits primär als Himmler unmittelbar unterstellt und nur pro forma ins Ahnenerbe eingegliedert betrachtete und andererseits Sievers zu keinem anderen Ahnenerbe-Mitarbeiter so viel Distanz hielt wie zu Rascher. Allerdings reagierte Sievers auf das

<sup>16</sup> BAArch, NS 21/921a, Denkschrift von Rascher vom 1.5.1939.

<sup>17</sup> Eugen Haagen/Brigitte Crodol, Versuche mit einem neuen getrockneten Fleckfieberimpfstoff, in: Zentralblatt für Bakteriologie, Parasitenkunde und Infektionskrankheiten vom 20.12.1944.

häufige Fehlverhalten – darunter erhebliche Verletzungen der Geheimhaltungsvorschriften – und die sehr eigenwillige Kommunikation Raschers auf eine für ihn ungewöhnlich milde Weise. Vermutlich durfte er den Himmler-Protégé Rascher nicht „hart anfassen“.<sup>18</sup> So fragte Sievers beispielsweise 1942 bei Himmlers Persönlichem Referenten Rudolf Brandt nach: „Am 23.02.42 schreibt mir Dr. Rascher u.a.: ‚Wie Sie vielleicht von der Reichsführung erfahren haben werden, habe ich mit dem Chef der Deutschen Versuchsanstalt für Luftfahrt, Berlin-Adlershof, Abteilung Flugmedizin, im Lager Dachau eine sehr interessante Versuchsreihe gestartet und hoffe, dass in wissenschaftlicher Beziehung für das Ahnenerbe dabei etwas Ordentliches herauskommt.‘ Da wir in dieser Hinsicht von Ihnen nichts erfahren haben, wäre ich für eine kurze Mitteilung dankbar, um was es sich handelt, oder soll ich mich deswegen an Dr. Rascher unmittelbar wenden?“<sup>19</sup>

Obschon Rascher in den Quellen als nahezu unkontrollierbar für Sievers wirkt, führte er für die Luftwaffe doch wehrwissenschaftliche Zweckforschungen durch und war zudem seit 1939 Ahnenerbe-Angehöriger. Sievers erhoffte sich augenscheinlich durch Dulden und Administrieren von Rascher Himmlers Wohlwollen. Vor allem aber erhoffte er sich von den Versuchen Raschers, die er später aus religiösen Gründen abgelehnt haben wollte, mehr Sichtbarkeit für das Ahnenerbe in der Wissenschaftslandschaft. Wohl auch deshalb war er zweimal in Dachau, um die grausamen Versuche mit tödlichem Ausgang persönlich anzusehen.<sup>20</sup>

Ein weiterer Schritt zur formalen Implementierung der Wehrwissenschaften in das Ahnenerbe war das Entomologische Institut, dessen Gründung ab Mitte 1941 vorbereitet wurde. Die Infektionswege von Insekten, zunächst auch von Ratten, auf Menschen sollten erforscht werden, um Übertragungen von Krankheiten zu verhindern. Im Vordergrund standen dabei Malaria und Fleckfieber. Fleckfieber schwächte nicht allein jene deutschen Truppenteile, die an der Front unter schlechten hygienischen Bedingungen untergebracht waren, sondern auch die KZ-Arbeitssklaven. Deren Ausbeutung war ein beträchtlicher Faktor bei der Finanzierung der SS. Daher hatte Himmler großes Interesse an den zu entwickelnden Präventionsmaßnahmen. Er befahl daher am 2. Januar 1942 die Gründung der neuen Einrichtung und deren Finanzierung aus Mitteln der Waffen-SS – und damit des Reiches. Nachdem Sievers mehrere Absagen renommierter Entomologen erhalten hatte, wurde Eduard May zum Leiter berufen. Als habilitierter Entomologe war er fachlich kompetent. Bemerkenswerterweise hatte er nie einer Gliederung der NSDAP angehört. Dies ist nur ein Beispiel dafür, wie pragmatisch Sievers handelte und wie wenig er dieses Handeln von ideologischen Erwägungen abhängig machte.<sup>21</sup>

Mit dem Programm des Entomologischen Instituts drang Sievers auf das Gebiet des eigentlich zuständigen Reichsarztes-SS, Ernst-Robert Grawitz, vor. Für die nächsten Jahre versuchte Grawitz – oft erfolglos –, Sievers' Einfluss auf die medizinische Forschung zu behindern.

<sup>18</sup> BAArch, NS 21/916, Sievers an Rascher vom 14.5.1943.

<sup>19</sup> Ebd., 845, Personalakte Rascher, Sievers an Brandt vom 9.3.1942.

<sup>20</sup> Reitzenstein, Forscher, S. 173f.

<sup>21</sup> Reitzenstein, Forscher, S. 87ff.

Während der Gründungsvorbereitungen für das Entomologische Institut nahm er am 23. November 1941 an der Wiedereröffnung der nunmehrigen →Reichsuniversität Straßburg teil und saß beim Festessen des Rektors mit dem Direktor der Anatomie, August Hirt, am Tisch.<sup>22</sup> Dieser hatte einen renommierten Lehrstuhl an der traditionsreichen Universität inne, seine Forschungen auf dem Gebiet der Intravitalmikroskopie galten als bahnbrechend. In den folgenden Wochen suchte Hirt die Unterstützung des Ahnenerbe für die Arbeiten seines Kollegen, des Geographen Georg Niemeier.<sup>23</sup> Vergeblich bemühte sich Sievers, den von der Universität weit überdurchschnittlich dotierten Mediziner für die Beforschung von Insekten im Entomologischen Institut zu gewinnen, wo dessen Gehalt sehr überschaubar gewesen wäre.<sup>24</sup> Sievers berichtete Himmler von der Begegnung mit Hirt. Beiden war bewusst, dass die Fakultäten das Ahnenerbe noch immer belächelten, obgleich Sievers erhebliche Professionalisierungsanstrengungen unternommen hatte. Dies war der wesentliche Grund, weshalb Sievers um Hirt warb sowie für alle Ahnenerbe-Forscher eine Habilitation anstrebte.

August Hirt war nicht nur ein renommierter Mediziner. Wenngleich er nie über „NS-Modethemen“ wie Rassenforschung oder völkische Fragestellungen gearbeitet hatte, war er Partei- und SS-Mitglied. Seine Mitarbeit im Ahnenerbe – in welcher Form auch immer – verhiess einen Prestigegewinn für die Forschungseinrichtung. So schrieb Himmlers Referent Brandt 1941 an Sievers: „Der Reichsführer-SS würde dem SS-Untersturmführer Prof. H. die Möglichkeit geben, mit Gefangenen und mit Berufsverbrechern, die sowieso nicht mehr in Freiheit können und mit den für eine Hinrichtung vorgesehenen Personen Versuche jeder Art anzustellen, die seine Forschungen fördern könnten.“<sup>25</sup> Diese später noch erweiterte Blanko-Zusage Himmlers nutzte Sievers fortan, um Hindernisse bei der Expansion seiner Einrichtung zu beseitigen. Ob es nun Eisenbezugsscheine für den Ausbau einer Gaskammer, Anforderungen von Häftlingen oder die unten beschriebenen Versuche Otto Bickenbachs und Eugen Haagens waren – Sievers stellte stets einen Zusammenhang mit den Forschungen Hirts her und verwies – meist erfolgreich – auf Himmlers Zusagen.<sup>26</sup>

Es wurde bereits auf Hirts wegweisenden intravitalmikroskopischen Untersuchungen hingewiesen. Er injizierte fluoreszierende Farbstoffe in Fröschen und Ratten und betäubte die Tiere. Durch einen kleinen Schnitt in der Haut zog er beispielsweise die arbeitenden Nieren der lebenden Tiere auf einen Objektträger. Durch das von ihm konstruierte Spezialmikroskop, das mit ultraviolettem Licht arbeitete, erleuchtete der eingebrachte Farbstoff die Zellen von innen. Hirt war dadurch in der Lage, wohl erstmals den Stoffwechsel in lebenden Zellen zu beobachten. Dabei stellte er fest, dass der Farbstoff Trypaflavin die Zellteilungen verlangsamt.<sup>27</sup>

22 BArch, VBS286–6400042889, Heft mit der Tischordnung der Veranstaltung vom 23.11.1941.

23 HStA Wiesbaden, Abt. 461, Nr. 34168 Prozessakte Beger, S. 81f.

24 Ebd., S. 86f., Hirt an Sievers vom 20.1.1942; Hirt bedauerte, „dass ich Ihnen keine bessere Auskunft geben kann und somit ein weiterer Versager auf ihrer bisherigen Suche bin.“

25 BArch, NS 19/1582, Brandt an Sievers vom 4.12.1942.

26 HStA Wiesbaden, Abt. 461, Nr. 34159 Prozessakte Beger, S. 110a, Sievers an Josef Kramer vom 5.4.1943 bezüglich der Inanspruchnahme des KZ Natzweiler durch Otto Bickenbach.

27 Archiv Deutsches Patent- und Markenamt, Patentschrift Nr. 581687 vom 30.10.1929 für August Hirt und Philipp Ellinger.



Der 1898 geborene Hirt, durch einen Kieferdurchschuss Kriegsinvalide, teilte das Trauma vieler Männer seiner Generation: Gaskrieg. Soldaten aller Nationen trugen im Zweiten Weltkrieg Gasmasken, da niemand wissen konnte, ob und wann eine kriegsführende Macht chemische Kampfstoffe einsetzen würde. Die deutsche Luftwaffe hatte am 2. Dezember 1943 bei der Bombardierung des italienischen Hafens Bari das US-Kriegsschiff John Harvey getroffen. Es hatte Berichten zufolge etwa 1.000 t Lost in rund 2.000 M47A1-Bomben geladen. 628 Opfer mussten medizinisch versorgt werden, 83 starben. Die Befürchtungen, es würde zum Einsatz von Giftgas kommen, waren demnach nicht unreal. Hirt glaubte herausgefunden zu haben, dass eine präventive Zuführung von hoch dosierten Vitaminen und eine verlangsamte Zellteilung nach Lost-Verletzungen ein wirksamer Schutz für die Opfer eines Lost- Angriffs sei. Nach aus seiner Sicht erfolgreichen Tierversuchen bedurfte es der Klärung, ob diese Ergebnisse auf den Menschen übertragbar waren. Jedoch war es aussichtslos, dafür hinreichend viele Freiwillige zu finden. Ein wirksamer Schutz gegen Kampfstoffe hätte politisches Kapital für Himmler innerhalb des Regimes und für Hirt weiteren wissenschaftlichen Ruhm bedeutet.

Sievers' wiederholte Versuche, Hirt hauptamtlich in das Ahnenerbe zu holen, scheiterten allesamt. Hirt machte deutlich, dass er zuerst Wissenschaftler und Beamter sei und ein beträchtliches Einkommen erziele, welches ihm das Ahnenerbe nicht bieten könne. Auch habe der Rektor die von Sievers angeregte Gründung eines An-Instituts durch das Ahnenerbe an der Universität Straßburg untersagt.<sup>28</sup> Jedoch sei Hirt gestattet worden, in seiner Freizeit für das Ahnenerbe tätig zu sein.<sup>29</sup> Im Sommer 1942 sprachen Sievers und Hirt ihre Zusammenarbeit ab. Die von Sievers gewährte Forschungsbeihilfe in Höhe von monatlich 316 RM machte nur einen Bruchteil von Hirts Einkommen aus, und auch die Mittel für Hirts Institut in Höhe von monatlich rund 2.000 RM waren im Vergleich zu seinem Gesamtbudget nicht sehr hoch. Hirts Briefe und Schriften sowie Zeitzeugenberichte präsentieren keinen fanatischen SS-Angehörigen oder Anhänger von Rassestheorien. Aus nachvollziehbaren Gründen änderte sich dieses Bild nach Kriegsende deutlich. Dennoch war Hirt ein passionierter Ahnenerbe-Mitarbeiter, der stets gern Gefälligkeiten erwies – von der Untersuchung von obduzierten Nervenzellen der Opfer Raschers, der Unterstützung des Rassekartenprojektes Bruno Begers, als anatomischer Dienstleister oder durch Zurverfügungstellung seiner Reputation für die Versuche von Bickenbach und Haagen. Gerade weil diese beiden Ärzte keine Angehörigen des Ahnenerbe waren oder gar dessen „Aushängeschilder“, hätten sie ohne Nutzung von Hirts Reputation und Sievers' Gebrauch des „Blanko-Befehls“ ihre mörderischen Versuche im KZ Natzweiler nicht ohne weiteres durchführen können. Dies zeigte sich insbesondere nach Unterstellung von Bickenbach unter Karl Brandt. Neben menschlichen Faktoren war es für Hirt entscheidend, dass er im Gegensatz zu vielen anderen Professoren in Straßburg seine Forschungen kontinuierlich fortsetzen konnte. Wann immer einer seiner Mitarbeiter eingezogen werden sollte, sorgte Sievers

<sup>28</sup> Bei einem An-Institut handelt es sich um eine organisatorisch, aber auch rechtlich eigenständige Einrichtung. Diese kooperieren auf einer vertraglich definierten Basis mit einer Hochschule. Sie gehören der Hochschule nicht unmittelbar an, sind aber personell und anderweitig oft eng mit der Hochschule verbunden.

<sup>29</sup> BArch, NS 21/904, Hirt an Sievers vom 10.10.1942.

für dessen UK-Stellung. Zudem vermochte Sievers, wozu die staatliche Universität nicht in der Lage war: Er beschaffte Material und Arbeitskräfte für die bauliche Fertigstellung des Anatomischen Instituts.

Ebenso ermöglichte Sievers, dass Hirt im KZ Natzweiler bei Straßburg an fünfzehn deutschen Häftlingen der Kategorie „BV“ („Berufsverbrecher“) mit flüssigem Lost seine im Tierversuch gewonnenen Ergebnisse an Menschen überprüfen konnte. Die Versuche wurden von Hirts Assistent Karl Kaspar Wimmer durchgeführt. Zehn Häftlinge erhielten die entwickelte Prophylaxe, fünf nahmen als Kontrollgruppe ungeschützt teil. Alle erhielten einmalig einige Tropfen wirksamen LOSTs auf die Unterarme. Wimmer dokumentierte die fortschreitenden Verbrennungen photographisch und obduzierte die drei Todesopfer. Hirt suchte bis Kriegsende im Tierversuch nach dem Grund für das Scheitern seiner Hypothese. Viele Indizien sprechen dafür, dass die Ursache in einer Überdosierung des wirksamen LOSTs der dritten Versuchsreihe durch Wimmer lag, nachdem das in zwei vorherigen Versuchsreihen eingesetzte Präparat sich als vollständig wirkungslos erwiesen hatte.<sup>30</sup>

Auch andere Projekte des Ahnenerbe wurden durch das Kriegsende gebremst: Einer der Häftlingsmitarbeiter von Sigmund Rascher war Robert Feix. Der vom Regime als „Halbjude“ qualifizierte Pektin-Experte war mit seiner Marmeladen-Gelierzucker-Firma Opekta in Frankfurt vermögend geworden. Nach der Machtübernahme versetzte er jüdische Mitarbeiter ins Ausland; Otto Frank, den Vater von Anne Frank, beispielsweise nach Amsterdam. Feix steuerte seinen internationalen Konzern von Wien aus. Nach dem „Anschluss“ Österreichs an Deutschland wurde er wegen angeblicher Devisenvergehen inhaftiert. Als Häftlingsmitarbeiter von Rascher erfand er das Blutstillmittel Polygal sowie den bis heute gebräuchlichen Instant-Kartoffelbrei. Polygal wurde ab Ende 1943 rasch das beherrschende Thema in Sievers' Arbeitsalltag. Das Präparat wurde aus Pektin, gewonnen aus Äpfeln und Rüben, hergestellt und als Tablette eingenommen. Es sollte Soldaten vor Sturmangriffen oder Flugzeugbesatzungen vor Einsätzen verabreicht werden. Bei Verletzungen sollte der Blutfluss verlangsamt werden, so dass die Überlebenschance bis zum Eintreffen medizinischer Hilfe vergrößert wurde. Polygal wurde auch in Lazaretten an SS-Leuten getestet. Bei kleineren Operationen war die Wirkung positiv, bei größeren – etwa Amputationen – nur bedingt. Parallel wurde eine Fabrik eingerichtet und mit der Massenproduktion begonnen. Rascher war verschiedenen Quellen zufolge von Häftlingen bestochen worden. Im Gegenzug beschäftigte er sie als Funktionshäftlinge in seiner Krankenstation und hielt sie so vom mörderischen Lageralltag im KZ Dachau fern. Auch hatte es einen ungeklärten Todesfall in seinem Privathaushalt gegeben. Zudem hatte seine sehr viel ältere Gattin mehrere Kinder entführt, um diese als eigene auszugeben. Rascher versuchte so, Himmler zu beeindrucken, der kinderreiche SS-Familien idealisierte. Nachdem die Entführungen und im Zuge der Ermittlungen die anderen Taten Raschers bekannt wurden, wurden die Eheleute Rascher in Konzentrationslagern inhaftiert und gegen Kriegsende auf Himmlers Befehl hingerichtet.<sup>31</sup>

<sup>30</sup> Reitzenstein, Forscher, S. 121ff.

<sup>31</sup> Reitzenstein, Forscher, S. 201 ff.



Nach Raschers Verhaftung übernahm Kurt Plötner dessen Abteilung. Er professionalisierte die chaotischen Versuchsreihen Raschers und kooperierte bei der Polygal- Entwicklung mit renommierten Universitätskliniken. Die anderen von Himmler befohlenen Projekte Raschers – wie Unterkühlung und andere Humanversuche – verweigerte Plötner unter stillschweigender Genehmigung Sievers'. Himmler stellte Versuche an Häftlingen gegen Kriegsende unter seinen persönlichen Genehmigungsvorbehalt. Jedoch hatte er die Befehle für Raschers Forschungsaufträge nicht zurückgenommen, während Sievers die Einstellung dieser Projekte durch Plötner Himmler gegenüber nicht weiter thematisierte. Kurz vor Kriegsende versuchte der für Fabrikationen zuständige Oswald Pohl die Fabrik aus Sievers' Institut an seine Deutsche Heilmittel GmbH im Wirtschaftsverwaltungshauptamt (WVHA) zu übertragen. Getrieben von der seit Ende 1944 realistischen Aussicht auf Gewinn für das Ahnenerbe und politisches Kapital für Himmler und sich selbst, verschleppte Sievers diese Übereignung bis Kriegsende.<sup>32</sup>

In dieser Phase trat Sievers' Streben nach größerer finanzieller Autonomie für das Ahnenerbe über das vom Reich finanzierte Institut für wehrwissenschaftliche Zweckforschung deutlich zu Tage. Dies insbesondere, seitdem ihn Wüst am 22. Februar 1944 darüber informiert hatte, dass Himmler die Zustimmung Hitlers besaß, „die Karls-Universität Prag zu erheben zur Universität „Das Ahnenerbe“.“<sup>33</sup> Der Autodidakt Sievers mag sich als zukünftigen Universitätskanzler gesehen haben. Ende 1944 etablierte er eine weitere Abteilung zur Mittelakquise im Institut für wehrwissenschaftliche Zweckforschung: In einer Mathematischen Abteilung sollten KZ-Häftlinge mit entsprechender akademischer Ausbildung komplexe Berechnungen durchführen, etwa für an neuen Waffensystemen forschende Ballistiker, für die Kriegsmarine und für die Wirtschaft.<sup>34</sup> Doch schon bald trat das Problem zu Tage, dass ungeklärt war, wer die Rechnungen ausstellen könne: Das Institut für wehrwissenschaftliche Zweckforschung hatte ebenso wenig eine Rechtspersönlichkeit, wie das Amt A (Ahnenerbe) des Persönlichen Stabes Reichsführer-SS. Der Verein Ahnenerbe und sein Finanzträger, die Ahnenerbe-Stiftung, hätten ihre Gemeinnützigkeit gefährdet, wenn sie kommerziell tätig geworden wären. Dieses Problem wurde bis Kriegsende nicht gelöst.<sup>35</sup>

Der Verein Ahnenerbe hatte bis 1937 seinen Personalbestand und sein Budget vervielfacht. Sievers organisierte geschickt die Expansion, jedoch war er in steuerlichen und Buchhaltungsfragen, sowie im Controlling noch unerfahren. Daher bedurfte es einer Fachabteilung für Finanzen und für Fundraising. Diese Abteilung wurde in Form der Ahnenerbe-Stiftung am 9. August 1937 von Himmler gegründet. Himmler beteiligte sich mit 5.000 RM, der Verein Ahnenerbe mit 3.000 RM Stiftungskapital.<sup>36</sup> Am 4. Oktober 1937 genehmigte das zuständige Reichsinnenministerium, vertreten durch den stellvertretenden Staatssekretär Wilhelm Stuck-

<sup>32</sup> Ebd., S. 287ff.

<sup>33</sup> NARA, T-580 Roll 462/463, Diensttagebuch Sievers vom 22.2.1944.

<sup>34</sup> BArch, NS 21/11 Diensttagebuch Sievers vom 12.10.1944.

<sup>35</sup> Ebd., 29, Sievers an Mohr vom 3.2.1945.

<sup>36</sup> LAB, C Rep 105 Nr. 4369 Stiftungskongvolut.

art, die Satzung.<sup>37</sup> Alleinvorstand der Stiftung wurde Bruno Galke, Leiter der „Wirtschaftlichen Hilfe“ im Persönlichen Stab Himmlers und zudem in den Anfangsjahren inoffizieller Kontrolleur Himmlers im Tagesgeschäft des Ahnenerbe. Da das Finanzamt zunächst immer wieder neue Gründe fand, die Gemeinnützigkeit der Stiftung nicht anerkennen zu müssen, wurde die Satzung mehrfach verändert. Nachdem Galke bei Himmler in Ungnade gefallen war und Anfang 1941 zum Wehrdienst einrücken musste, wurde Helmuth Fitzner sein Stellvertreter für die Dauer des Krieges. Die Zusammenarbeit zwischen Fitzner und Sievers verlief problemlos. Wenngleich es auch direkte Zuwendungen gab, lief die Etatisierung des Ahnenerbe in der Regel über die Stiftung. Diese erhielt Zuwendungen in verschiedener Form, einerseits direkte Spenden wie etwa von BMW, Daimler-Benz und der Deutschen Bank.<sup>38</sup> Andererseits erhielt sie Zuwendungen von institutionellen Gebern, wie dem Wirtschaftsverwaltungshauptamt, dem Stabshauptamt des Reichskommissars für die Festigung des deutschen Volkstums, sowie der Lippischen Landesregierung. Hinzu kamen faktisch ungesicherte Darlehen. So gab Himmlers Hausbank, die Dresdner Bank, 1940 ein Darlehen in Höhe von 100.000 RM. Es wurde zudem ein variables Kreditkonto bei der Dresdner Bank bis zur Höhe von 400.000 RM zu Gunsten der Ahnenerbe-Stiftung eingerichtet. Es spricht für Sievers' Finanzmanagement, dass er im Jahre 1944 festhielt, der Kreditrahmen sei längere Zeit nicht in Anspruch genommen worden.<sup>39</sup> Zu den größten Gebern gehörte neben dem „Freundeskreis Reichsführer-SS“ und der DFG die Anton Loibl GmbH.<sup>40</sup> Die SS und der Erfinder Anton Loibl verwerteten über diese Gesellschaft dessen Patent für Fahrradpedalrückstrahler, die Himmler über seine Position im Innenministerium für jedes Rad vorschrieb. Da die an Lebensborn e. V. und Ahnenerbe-Stiftung abgeführten Lizenz-einnahmen jedoch weit höher waren als die Gesellschaft verkraften konnte und wollte, kaufte der WVHA-Chef Oswald Pohl 1940 die Anteile Loibls für die SS an.<sup>41</sup> Die Ahnenerbe-Stiftung unterhielt den Ahnenerbe-Stiftungs-Verlag, der ebenfalls seine Erträge an die Stiftung abführte. Da das Verlagsprogramm jedoch nicht primär nach Nachfragegesichtspunkten, sondern nach ideologischen Vorgaben und strategischen Anforderungen des Ahnenerbe ausgerichtet war, trug der Verlag nicht wesentlich zum Etat der Stiftung bei. Neben der Finanzierung des Ahnenerbe über die Ahnenerbe-Stiftung gab es direkte Zuwendungen und auch Etat-Entlastungen. Da das Ahnenerbe für Himmler in dessen Funktion als →Reichskommissar für die Festigung des deutschen Volkstums (RKF) auch Forschungsarbeiten durch die →SS-Kulturkommission in Südtirol durchführte, erhielt es Kostenerstattungen durch den RKF.<sup>42</sup> Neben diesen Regelfinanzierungen gab es auch Sonderfälle. So wurde das Gehalt von Ahnenerbe-Volksmusikforscher

37 Ebd., Genehmigungsvermerk von Stuckart vom 14.10.1937 im Stiftungskonvolut.

38 BArch, NS 21/592, Konvolut Abrechnungen und Korrespondenzen.

39 BArch, NS 21/11 Diensttagebuch Sievers vom 11. und 12.10.1944.

40 Während die DFG vorwiegend finanzielle Mittel und Geräte bereitstellte, unterstützte der Reichsforschungsrat vorwiegend mit Berechtigungen zum Bezug von bewirtschaftetem Material oder Personal über sogenannte Dringlichkeitsstufen.

41 BArch, NS 3/1435: Stellungnahme des Finanzamtes München-West zur Anfechtungsschrift des Anton Loibl vom 25.07.1941, Aktenzeichen S. 1210.

42 Ebd., NS 21/127 Diensttagebuch Sievers vom 1.3.1941.

Alfred Quellmalz und seiner Mitarbeiterin Gertraud Simon zeitweise vom Reichswissenschaftsministerium bezahlt.<sup>43</sup> Aber der Finanzbedarf des Ahnenerbe wuchs stetig, so dass immer neue Finanzierungsquellen erschlossen werden mussten. Ein Beispiel sind die SS-Leithefte, für die auch das Ahnenerbe Beiträge lieferte. Ab 1941 sollten die Beiträge nur noch entgeltlich zur Verfügung gestellt werden. Ein anderes Beispiel ist die Übernahme der Kosten des Entomologischen Instituts und des Instituts für wehrwissenschaftliche Zweckforschung durch die Waffen-SS und damit durch das Reich. Anfang 1943 wurde das Reichsinstitut Sven Hedin gegründet, dessen Kosten vom Reich getragen wurden. Dieses Institut war identisch mit der parallel weiter bestehenden Ahnenerbe-Forschungsstätte Innerasien und Expeditionen, für die Sievers fortan kaum mehr Mittel aufwenden musste.<sup>44</sup>

Die Ahnenerbe-Stiftung wurde, wie eingangs erwähnt, am 2. September 1948 von Amts wegen aufgelöst, „da sie vermögenslos ist und ihr Zweck nicht mehr den heutigen Anschauungen entspricht.“<sup>45</sup> Noch viele Jahre später suchten die Behörden vergeblich, „den Verbleib des Stiftungsvermögens zu klären.“<sup>46</sup>

Seit August 1943 bereiste Sievers von der Ausweichstelle des Ahnenerbe im oberfränkischen Waischenfeld nahezu ununterbrochen bis Kriegsende die im besetzten Europa verstreuten SS-Forschungsstätten und Abteilungen. Das SS-Ahnenerbe war eine genuin nationalsozialistische Gründung. Es gab zu keinem Zeitpunkt eine weit in die Zukunft gerichtete Planung für den Aufbau und die strategische Entwicklung des Ahnenerbe. Sievers gründete opportunistisch aufgrund politischer und wirtschaftlicher Überlegungen und ohne grundsätzliche Strategie die einzelnen Abteilungen. Er versuchte, bestehende Einrichtungen und erwünschte Forscher durch Forschungsförderung, Drittmittelstellen und Forschungsbeihilfen an das Ahnenerbe zu binden. Sievers' Bestrebungen gingen dahin, das Ahnenerbe als wissenschaftliche Einrichtung zu etablieren und – vergeblich – zu einer Universität auszubauen.

Er nutzte in Bezug auf weitere potentielle Forschungsfelder jede Gelegenheit, das Ahnenerbe in jedes vermeintliche Vakuum hinein auszubauen. Dabei strebte er die Vergrößerung der eigenen Machtposition an, indem er Himmler, dessen Ziele und ideologische Vorstellungen er gut kannte, servil entgegen arbeitete. Mit den von Sievers präsentierten Forschungsergebnissen sollte Himmler im Machtkampf zwischen den Mächtigen des Regimes in die Lage versetzt werden, seinerseits dem Diktator entgegen zu arbeiten.<sup>47</sup> Im Laufe der Entwicklung des Ahnenerbe und besonders des Instituts für wehrwissenschaftliche Zweckforschung wurde Wolfram Sievers informeller Sonderkommissar der SS für Wissenschaft und Wehrmedizin.

Die Entwicklung des IWZ und des Ahnenerbe bestätigt auf einer nachgelagerten, keineswegs aber unwichtigen Ebene des Regimes die These der „Funktionalisten“. Ein einzelner

<sup>43</sup> Ebd., Diensttagebuch Sievers vom 23.1.1941.

<sup>44</sup> HStA, Wiesbaden Abt. 461, Nr. 34164 Prozessakte Beger, S. 13c.

<sup>45</sup> LAB, C Rep 105 Nr. 4369, Beschluss vom 2.9.1948.

<sup>46</sup> Ebd., Vermerk vom 21.1.1950.

<sup>47</sup> Vgl. Ian Kershaw, Hitler, München 2013: Kershaw erklärt einen Machtmechanismus des NS-Regimes als „dem Führer entgegen arbeiten“. Andere Historiker, wie Bernhard Gotto bestätigten diesen Mechanismus auch für nachgelagerte Ebenen des Regimes.

Wissenschaftsmanager war aufgrund eines persönlichen Beziehungsgeflechts in der Lage – mit Duldung und Unterstützung des ihm zumeist gewogenen Vorgesetzten Himmler, aber ohne dessen vorherigen Befehl – seine Einrichtung stetig zu erweitern, aber auch eine neue Forschungseinrichtung wie das Institut für wehrwissenschaftliche Zweckforschung zunächst im Rahmen des Ahnenerbe zu errichten und im Sinne der SS sowie der eigenen Ambitionen auszurichten.

*Julien Reitzenstein*

---

**Erstveröffentlichung in:** Fahlbusch, Michael, Haar, Ingo and Pinwinkler, Alexander. Handbuch der völkischen Wissenschaften: Akteure, Netzwerke, Forschungsprogramme. Berlin, Boston: De Gruyter Oldenbourg, 2017.

<https://doi.org/10.1515/9783110429893>
